# Supplementary material for: CD19-CAR-T Cells Bearing a KIR/PD-1-Based Inhibitory CAR Eradicate CD19+HLA-C1− Malignant B Cells While Sparing CD19+HLA-C1+ Healthy B Cells
Source: PubMed Central journal article supplement (PMC7564565; doi:10.3390/cancers12092612), 2020-09-13

# Supplementary Materials: CD19-CAR-T Cells Bearing a KIR/PD-1-Based Inhibitory CAR Eradicate CD19<sup>+</sup>HLA-C1<sup>-</sup> Malignant B Cells While Sparing CD19<sup>+</sup>HLA-C1<sup>+</sup> Healthy B Cells <sup>†</sup>

Lei Tao, Muhammad Asad Farooq, Yaoxin Gao, Li Zhang, Congyi Niu, Iqra Ajmal, Ying Zhou, Cong He, Guixia Zhao, Jie Yao, Mingyao Liu and Wenzheng Jiang

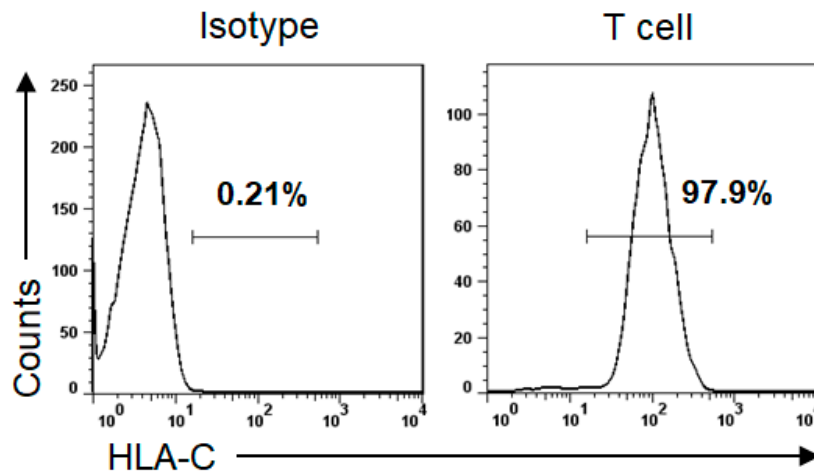

**Figure S1.** HLA-C1 expression in primary T cells. HLA-C1 expression on surface of T cells was analyzed by flow cytometry with PE-anti-human HLA-C antibody. Data are representative of 3 different donors.

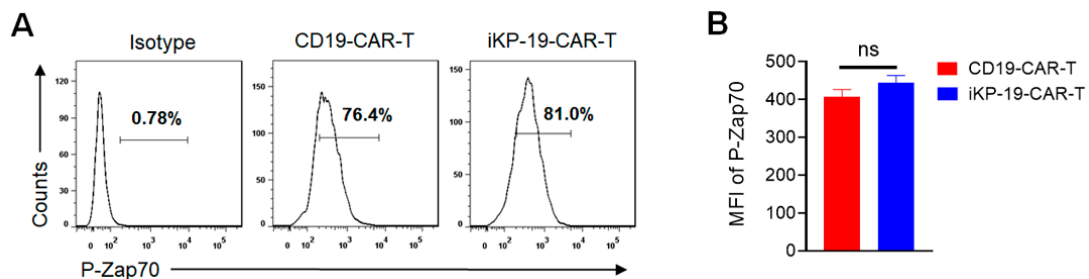

**Figure S2.** The expression of P-Zap70 in CD19-CAR-T or iKP-19-CAR-T cells at day 10. **A**, The expression of P-Zap70 in CD19-CAR-T or iKP-19-CAR-T cells was assayed by flow cytometry with PE-anti-human P-Zap70 antibody and data are representative of 3 different experiments. **B**, MFI of P-Zap70 was statistically analyzed. ns, not significant. Error bars represent  $\pm$  SD.

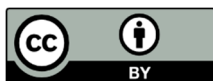

Supplement: cancers-12-02612-s001.pdf [file cancers-12-02612-s001.pdf]
